# Supplementary material for: A critical role for endocytosis in Wnt signaling
Source: Springer Nature journal article supplement (doi:10.1186/1471-2121-7-28), 2006-07-06

**a**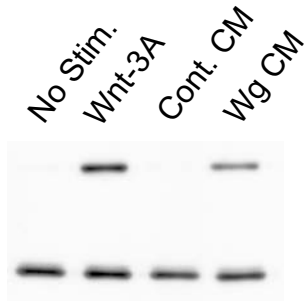**b**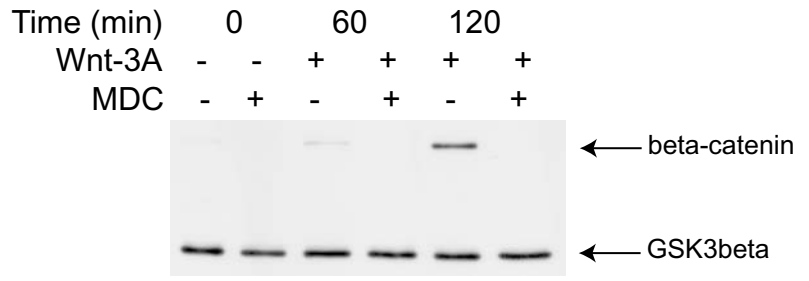**c**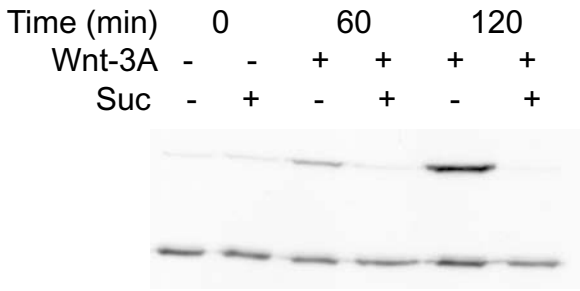**d**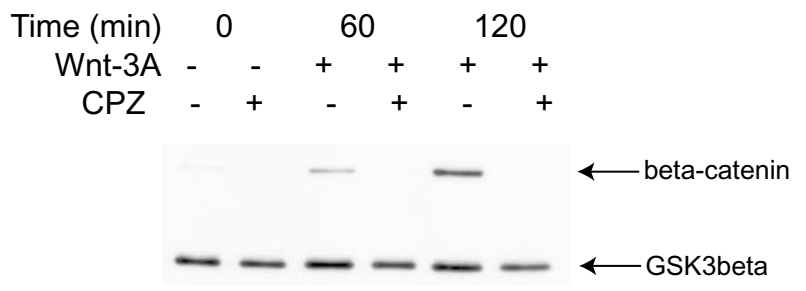**e**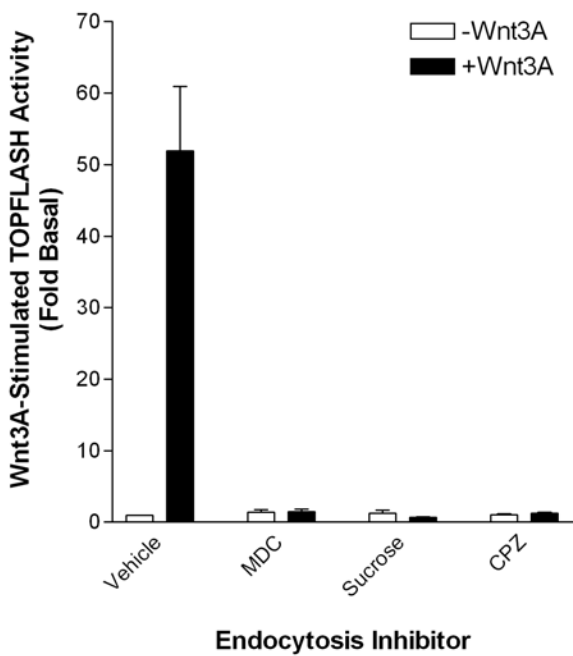**f**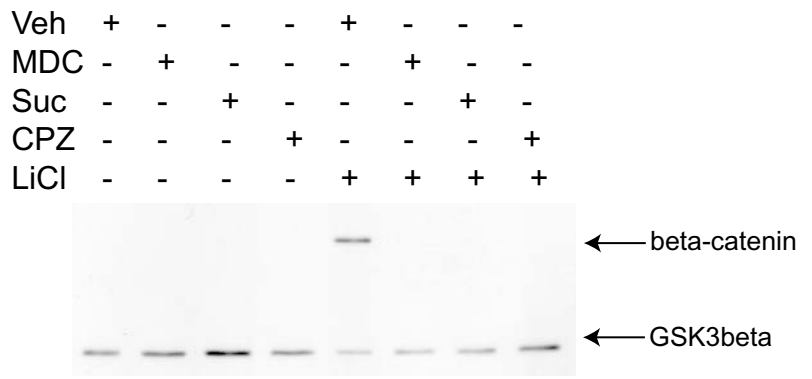**g**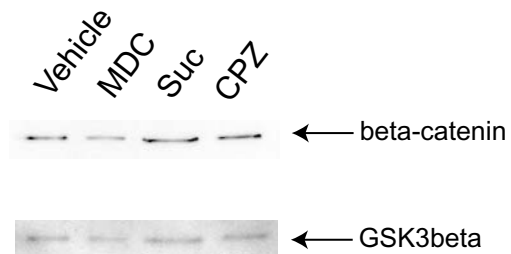

Supplement: 12860_2006_201_MOESM3_ESM.pdf [file 12860_2006_201_MOESM3_ESM.pdf]
