# Supplementary material for: A critical role for endocytosis in Wnt signaling
Source: Springer Nature journal article supplement (doi:10.1186/1471-2121-7-28), 2006-07-06

-Wnt-3A

+ Wnt-3A

beta-catenin

GFP

beta-catenin

GFP

GFP

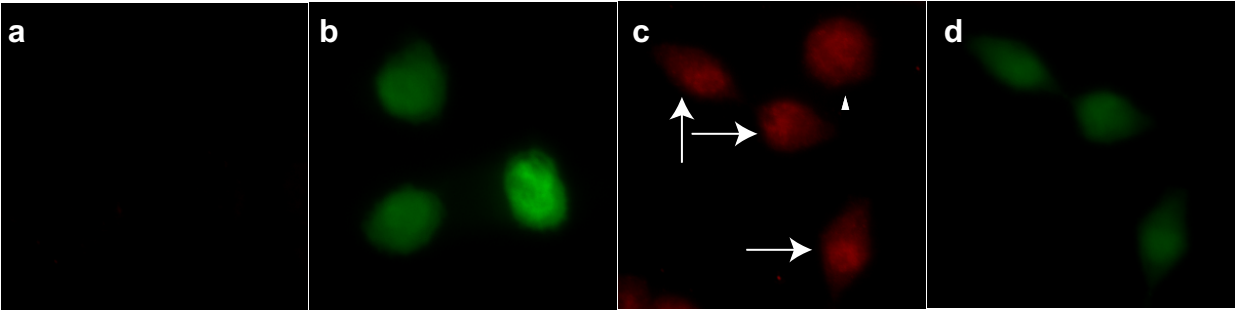

GFP/WT Dyn

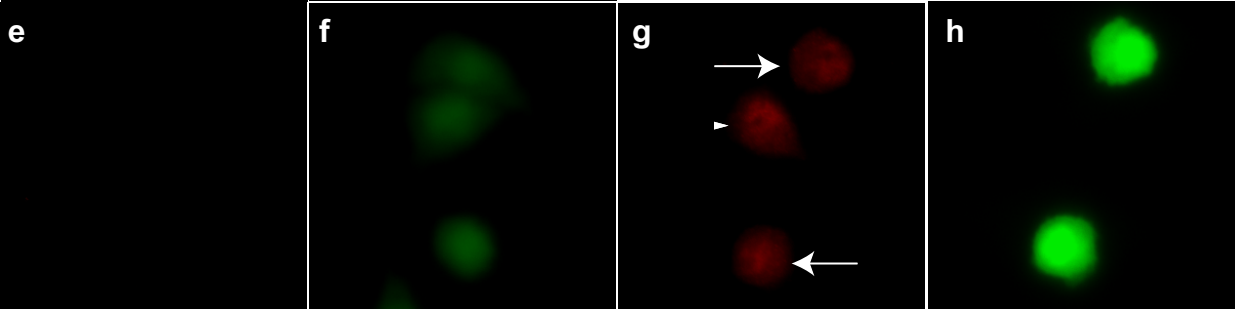

GFP/K44E Dyn

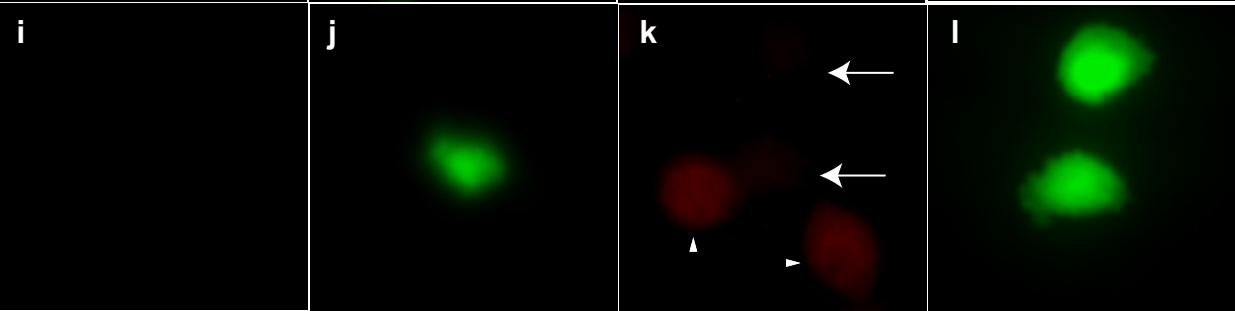

m

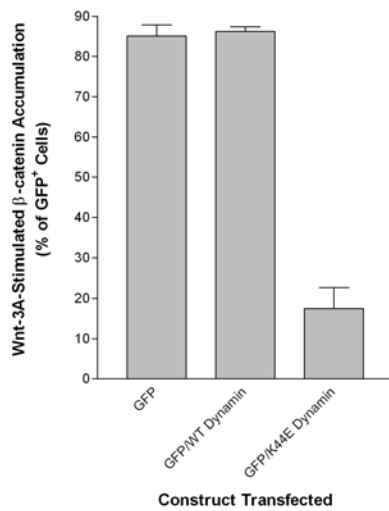

n

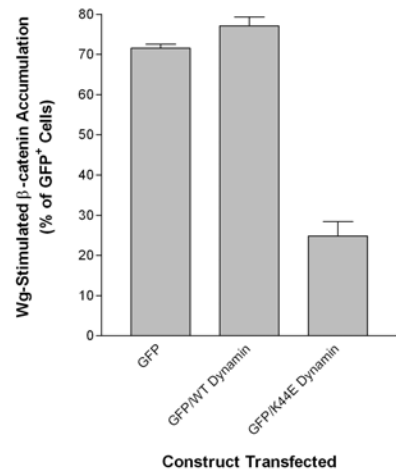

Supplement: 12860_2006_201_MOESM4_ESM.pdf [file 12860_2006_201_MOESM4_ESM.pdf]
